# Supplementary material for: Exploring thermal transitions in anthradithiophene-based organic semiconductors to reveal structure-packing relationships
Source: Royal Society of Chemistry journal article supplement (doi:10.1039/c8tc03976c), 2018-01-01
Supplement: c8tc03976c1.pdf [file c8tc03976c1.pdf]

**Supporting Information**

**Exploring Thermal Transitions in Anthradithiophene-based Organic  
Semiconductors to Reveal Structure-Packing Relationships**

Shi Li, Sean M. Ryno, & Chad Risko

Department of Chemistry &  
Center for Applied Energy Research  
University of Kentucky  
Lexington, Kentucky 40506 USA

Corresponding author: [chad.risko@uky.edu](mailto:chad.risko@uky.edu)

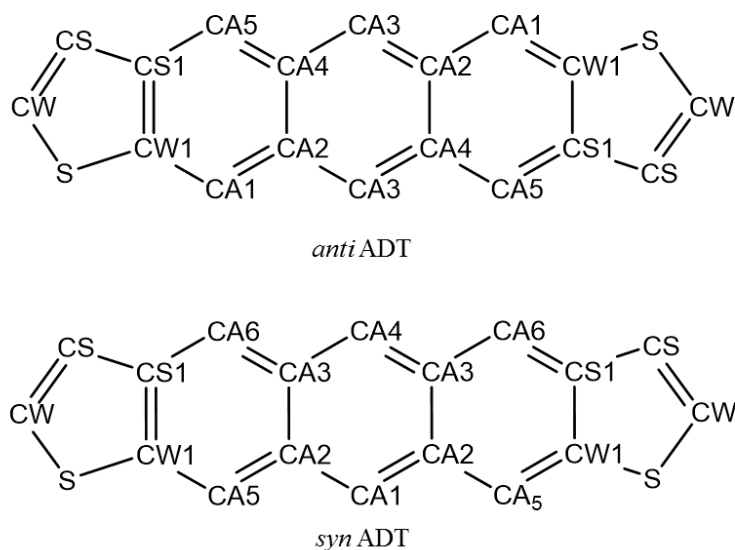

**Figure S1.** Chemical structures of *anti* and *syn* ADT with atom labels used for the bond and angle analyses.

**Table S1.** Select bond lengths for *anti* and *syn* ADT as determined by molecular mechanics (MM) energy minimization using the OPLS-AA force field and density functional theory (DFT) optimizations at B3LYP/6-31G(d,p) level. Atom labels are given in Figure S1.

| Bond #  | <i>anti</i> ADT |          |       | <i>syn</i> ADT |          |       |
|---------|-----------------|----------|-------|----------------|----------|-------|
|         | DFT [ Å ]       | MM [ Å ] | SD    | DFT [ Å ]      | MM [ Å ] | SD    |
| S-CW    | 1.761           | 1.753    | 0.004 | 1.761          | 1.768    | 0.004 |
| CW-CS   | 1.353           | 1.365    | 0.006 | 1.353          | 1.358    | 0.003 |
| CS-CS1  | 1.446           | 1.458    | 0.006 | 1.446          | 1.446    | 0.000 |
| CS1-CA5 | 1.379           | 1.386    | 0.003 | -              | -        | -     |
| CA4-CA5 | 1.422           | 1.424    | 0.001 | -              | -        | -     |
| CA3-CA4 | 1.402           | 1.409    | 0.004 | 1.402          | 1.409    | 0.004 |
| CA2-CA3 | 1.400           | 1.412    | 0.006 | -              | -        | -     |
| CA1-CA2 | 1.427           | 1.427    | 0.000 | 1.401          | 1.418    | 0.008 |
| CA1-CW1 | 1.370           | 1.370    | 0.000 | -              | -        | -     |
| CW1-S   | 1.769           | 1.769    | 0.000 | 1.769          | 1.767    | 0.001 |
| CW1-CS1 | 1.444           | 1.450    | 0.003 | 1.444          | 1.453    | 0.005 |
| CA2-CA3 | 1.453           | 1.451    | 0.001 | 1.453          | 1.462    | 0.004 |
| CS1-CA6 | -               | -        | -     | 1.379          | 1.374    | 0.002 |
| CA3-CA6 | -               | -        | -     | 1.423          | 1.430    | 0.003 |
| CA5-CW1 | -               | -        | -     | 1.370          | 1.385    | 0.007 |

**Table S2.** Select bond angles for *anti* and *syn* ADT determined by molecular mechanics (MM) energy minimization using the OPLS-AA force field and density functional theory (DFT) optimizations at B3LYP/6-31G(d,p) level. Atom labels are given in Figure S1.

| Angle       | <i>anti</i> ADT |          |       | <i>syn</i> ADT |          |       |
|-------------|-----------------|----------|-------|----------------|----------|-------|
|             | DFT [ ° ]       | MM [ ° ] | SD    | DFT [ ° ]      | MM [ ° ] | SD    |
| S-CW1-CS1   | 113.893         | 114.584  | 0.346 | 113.887        | 113.713  | 0.087 |
| CW1-CS1-CS2 | 113.228         | 112.540  | 0.344 | 113.224        | 113.679  | 0.227 |
| CS1-CS2-CW2 | 110.476         | 110.980  | 0.252 | 110.477        | 110.761  | 0.142 |
| CS2-CW2-S   | 110.767         | 111.361  | 0.297 | 110.768        | 111.385  | 0.309 |
| CW2-S-CW1   | 90.637          | 90.536   | 0.050 | 90.644         | 90.460   | 0.092 |

**Table S3.** Unit cell parameters and densities determined from MD simulations using the OPLS-AA force field in comparison to those from the experimental crystal structure reported in ACS Applied Materials & Interfaces 2013, 5, 9670.

|                               | <i>anti</i> ADT |        |       | <i>syn</i> ADT |        |       |
|-------------------------------|-----------------|--------|-------|----------------|--------|-------|
|                               | MD              | CIF    | SD    | MD             | CIF    | SD    |
| a [ Å ]                       | 5.972           | 5.916  | 0.028 | 5.916          | 5.887  | 0.014 |
| b [ Å ]                       | 7.846           | 7.772  | 0.037 | 7.545          | 7.508  | 0.018 |
| c [ Å ]                       | 14.125          | 13.991 | 0.067 | 14.418         | 14.347 | 0.035 |
| $\alpha$ [ ° ]                | 86.600          | 86.589 | 0.005 | 96.160         | 96.100 | 0.030 |
| $\beta$ [ ° ]                 | 78.300          | 78.271 | 0.014 | 94.300         | 94.300 | 0.000 |
| $\gamma$ [ ° ]                | 86.400          | 86.424 | 0.012 | 89.600         | 90.400 | 0.400 |
| Density [ g/cm <sup>3</sup> ] | 1.490           | 1.540  | 0.025 | 1.510          | 1.530  | 0.010 |

**Table S4.** Potential of mean force (PMF) minima center- of-mass (COM) distances and those obtained from the respective crystal structures.

|                     | PMF         |              | Bulk Crystal (nm) |
|---------------------|-------------|--------------|-------------------|
|                     | Minima (nm) | Plateau (nm) |                   |
| <i>anti</i> ADT     | 0.389       | 1.510        | 0.474             |
| <i>syn</i> ADT      | 0.400       | 1.520        | 0.488             |
| <i>anti</i> TES ADT | 0.404       | 1.910        | 0.673             |
| <i>syn</i> TES ADT  | 0.404       | 1.910        | 0.630             |

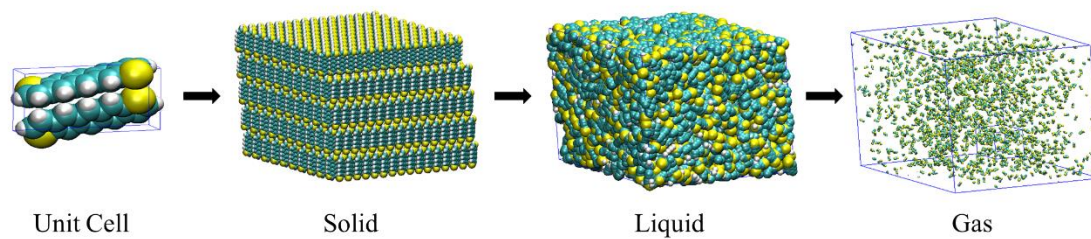

**Figure S2.** Annealing simulation work protocol.

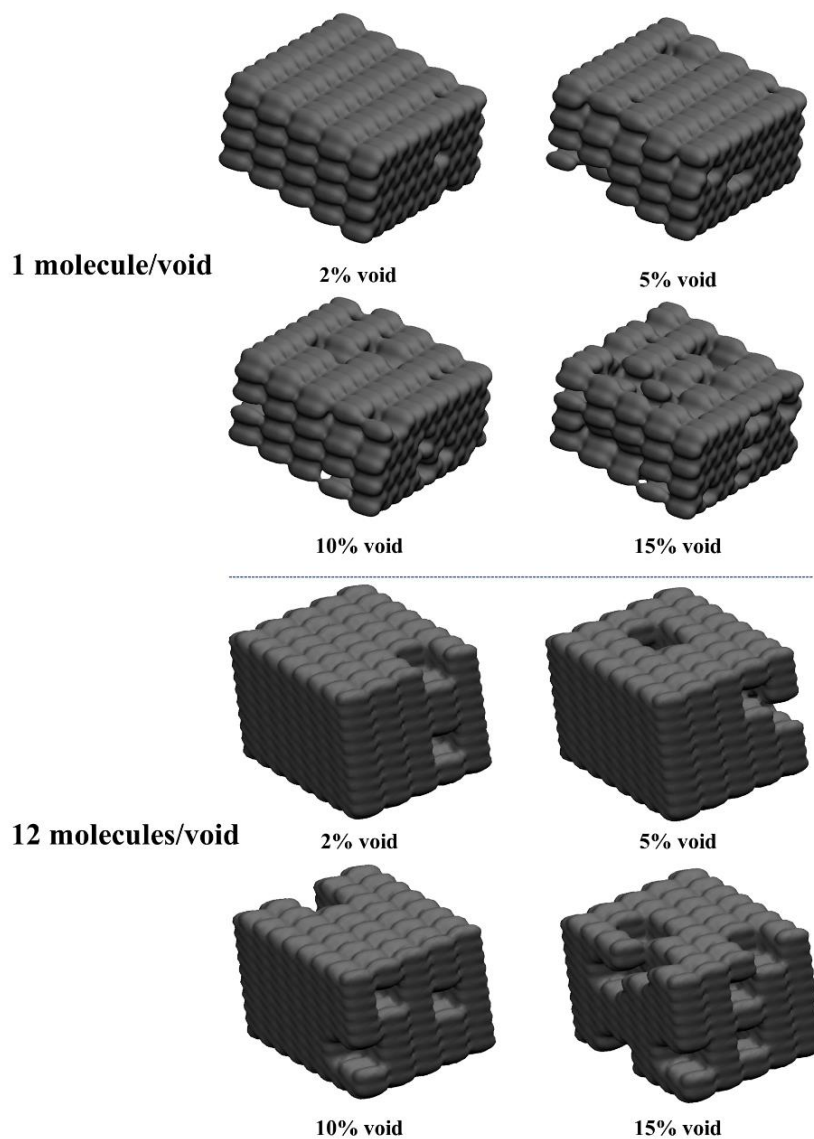

**Figure S3.** Representations of the void methods implemented. (Top) Each void was created by removing one molecule to create the void. (Bottom) Each void was created by removing a group of 12 molecules to create the void. The void percentage was calculated based on the total number of molecules removed from the bulk crystal.

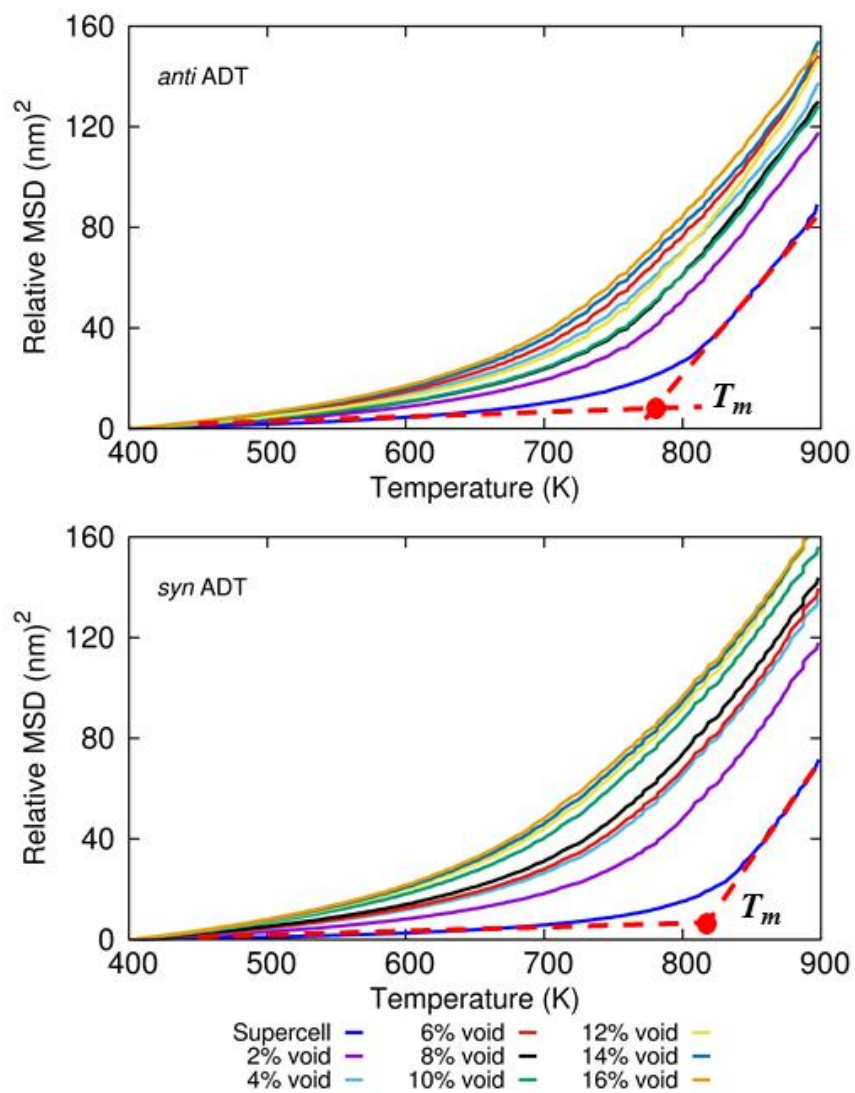

**Figure S4.** Relative MSD as a function of anneal temperature of the *anti* and *syn* ADT systems with voids of varying percentage. The MSD of the void free supercell for each system is also included. Dashed lines indicate the two linear trend lines of solid and liquid phases, and the intersection  $T_m$  is marked for reference; one example is given in each plot.

*anti* ADT

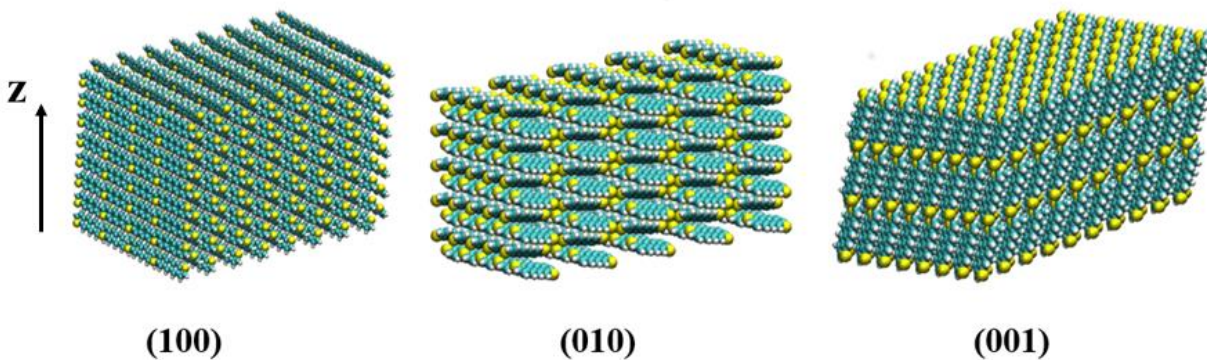

*syn* ADT

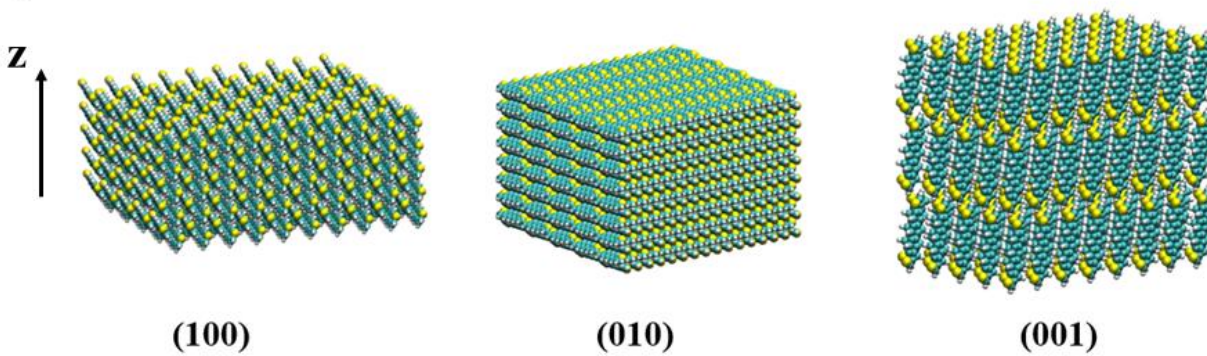

**Figure S5.** *Anti* (top) and *syn* (bottom) ADT slabs; the vacuum gap is along *z*-direction.



***anti* ADT (100)**

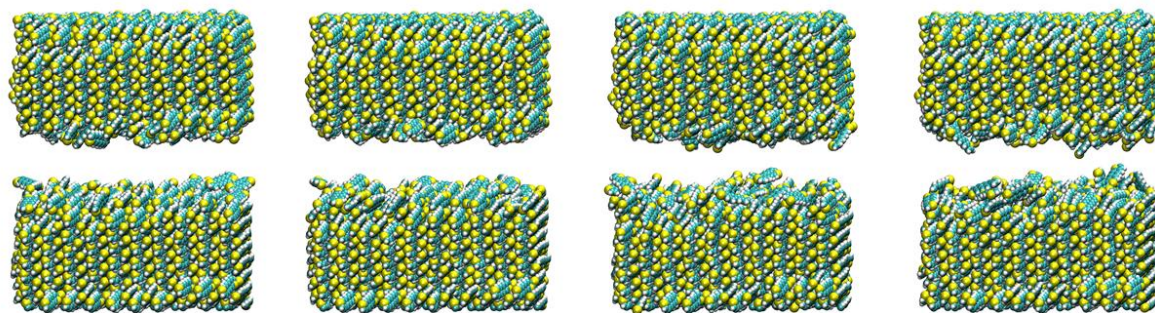

508 K

522 K

570 K

600 K

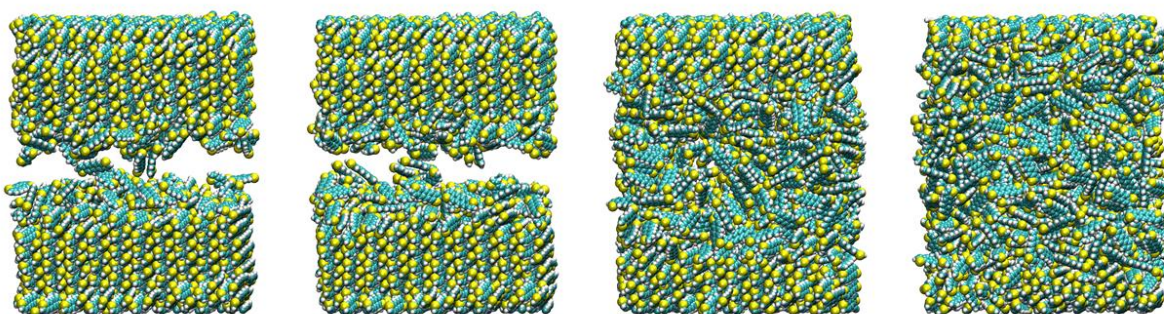

640 K

660 K

700 K

710 K

***anti* ADT (010)**

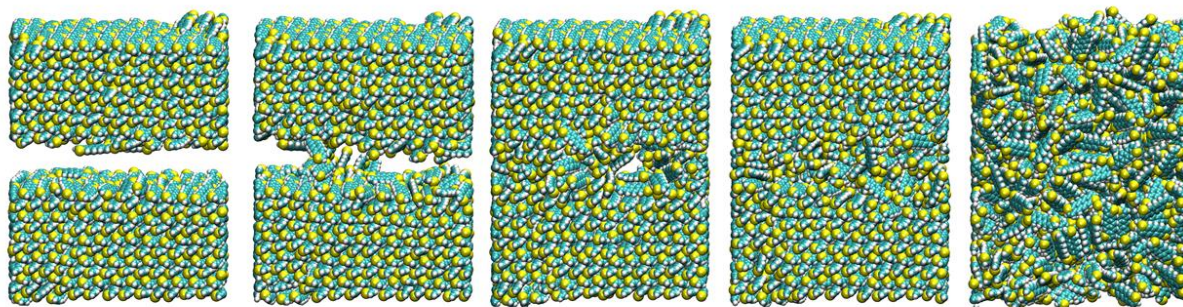

575 K

590 K

640 K

660 K

720 K

***anti* ADT (001)**

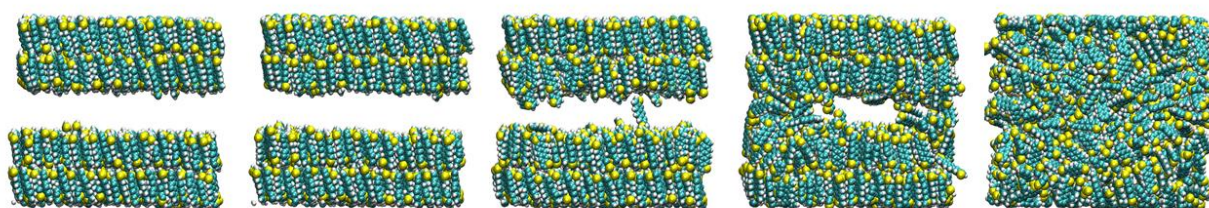

725 K

760 K

770 K

775 K

780 K

**Figure S6.** Snapshots of different *anti* ADT slabs during annealing.



***syn* ADT (100)**

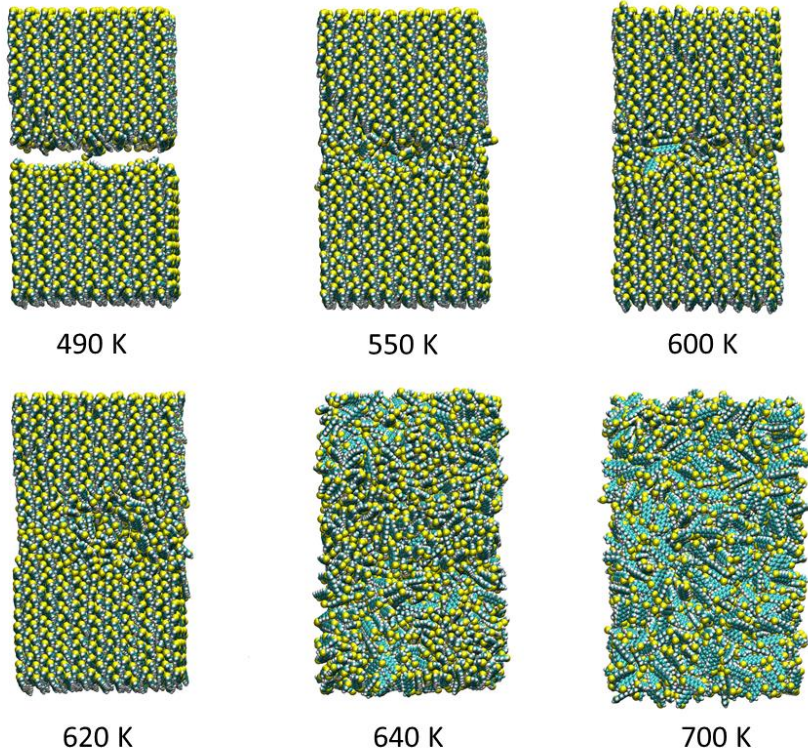

***syn* ADT (010)**

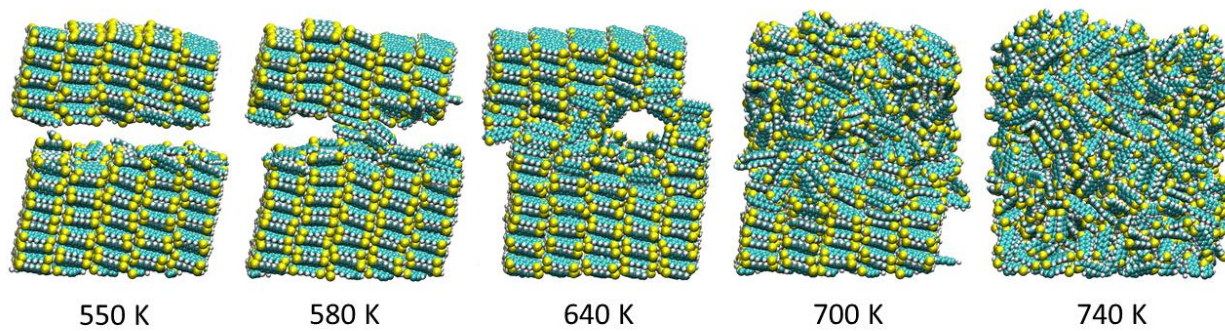

***syn* ADT (001)**

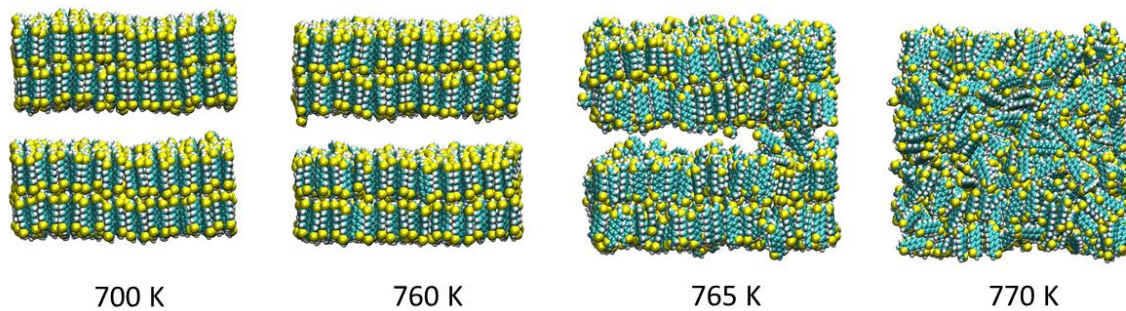

**Figure S7.** Snapshots of different *syn* ADT slabs during annealing.

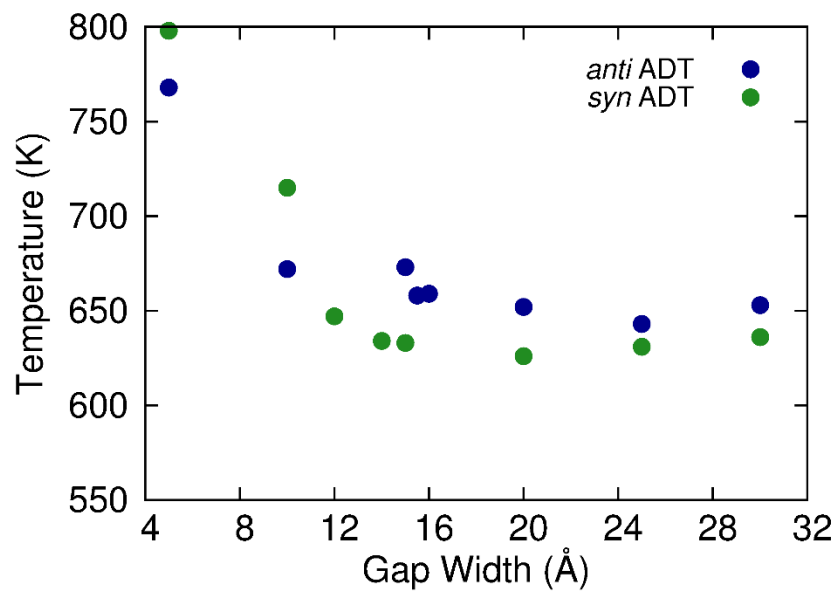

**Figure S8.**  $T_m$  as a function of the (010) gap width for *anti* (blue dot) and *syn* (green dot) ADT.

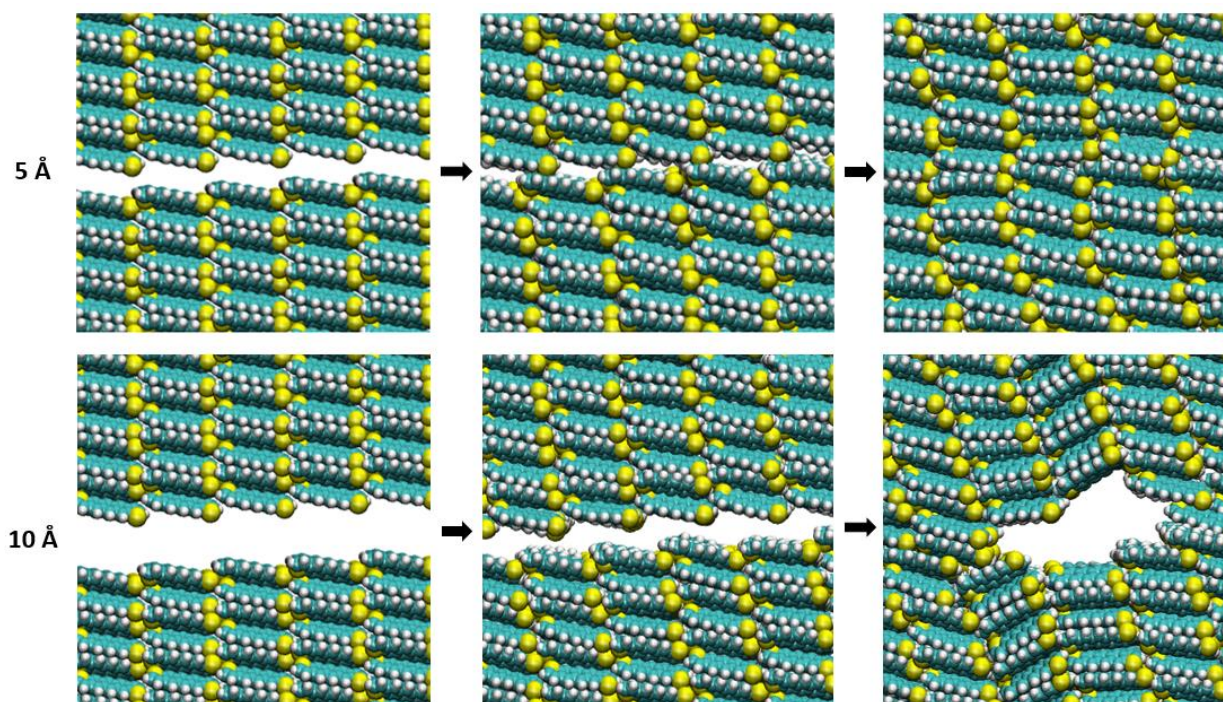

**Figure S9.** *Anti* ADT with 5  $\text{\AA}$  and 10  $\text{\AA}$  vacuum gap along the (010) surface to demonstrate differences in the melting process as a function of vacuum gap width during NVT equilibrium.



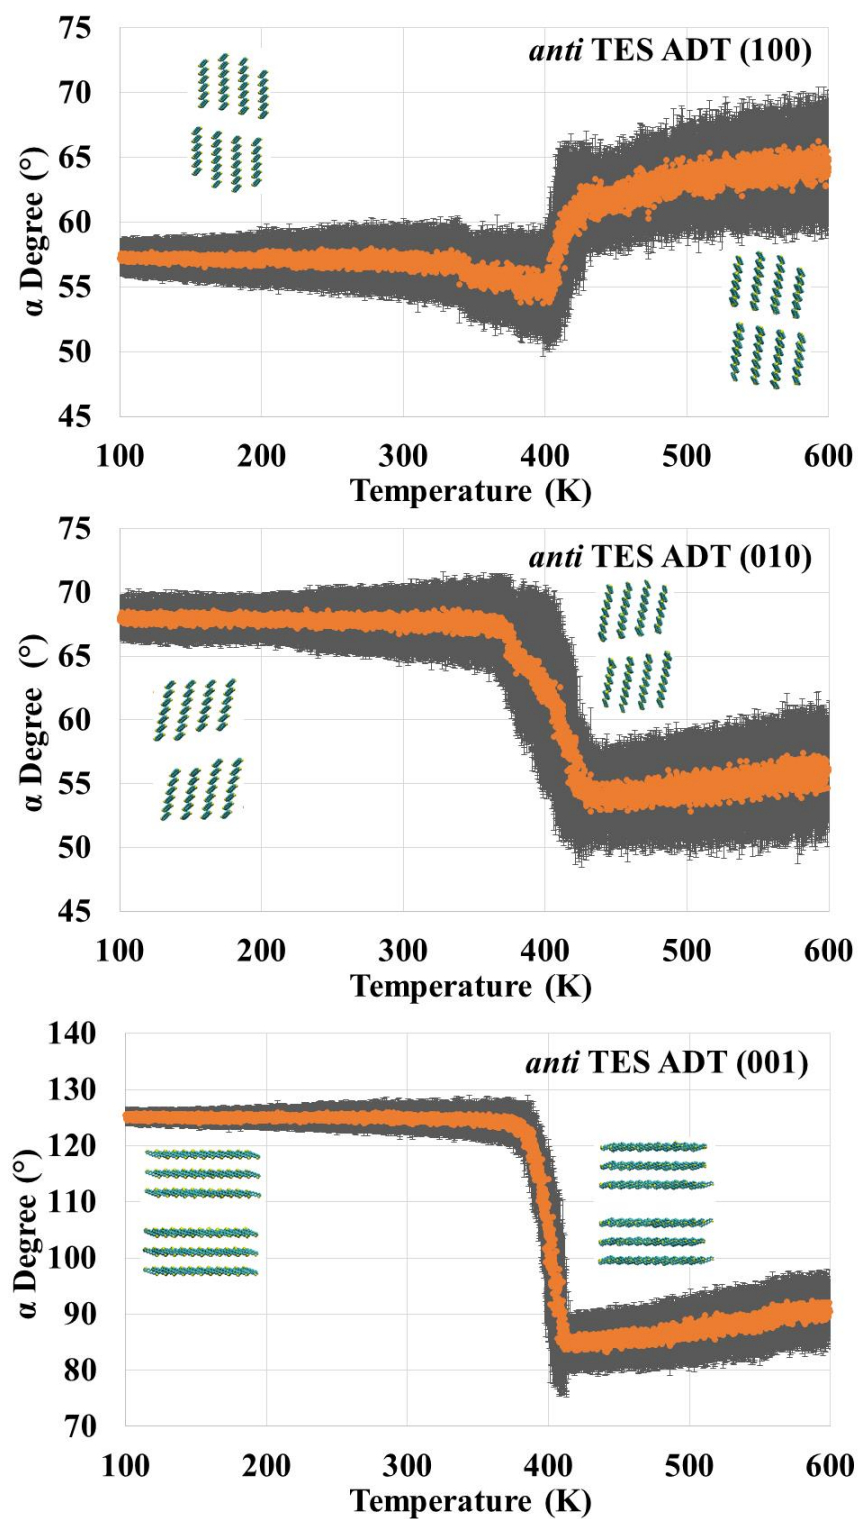

**Figure S10.** The angle between *anti* TES ADT backbone long-axis vector with respect to the *z*-direction as function of the annealing temperature of different slab systems. The inset snapshots show the backbone directions before and after reorientation.

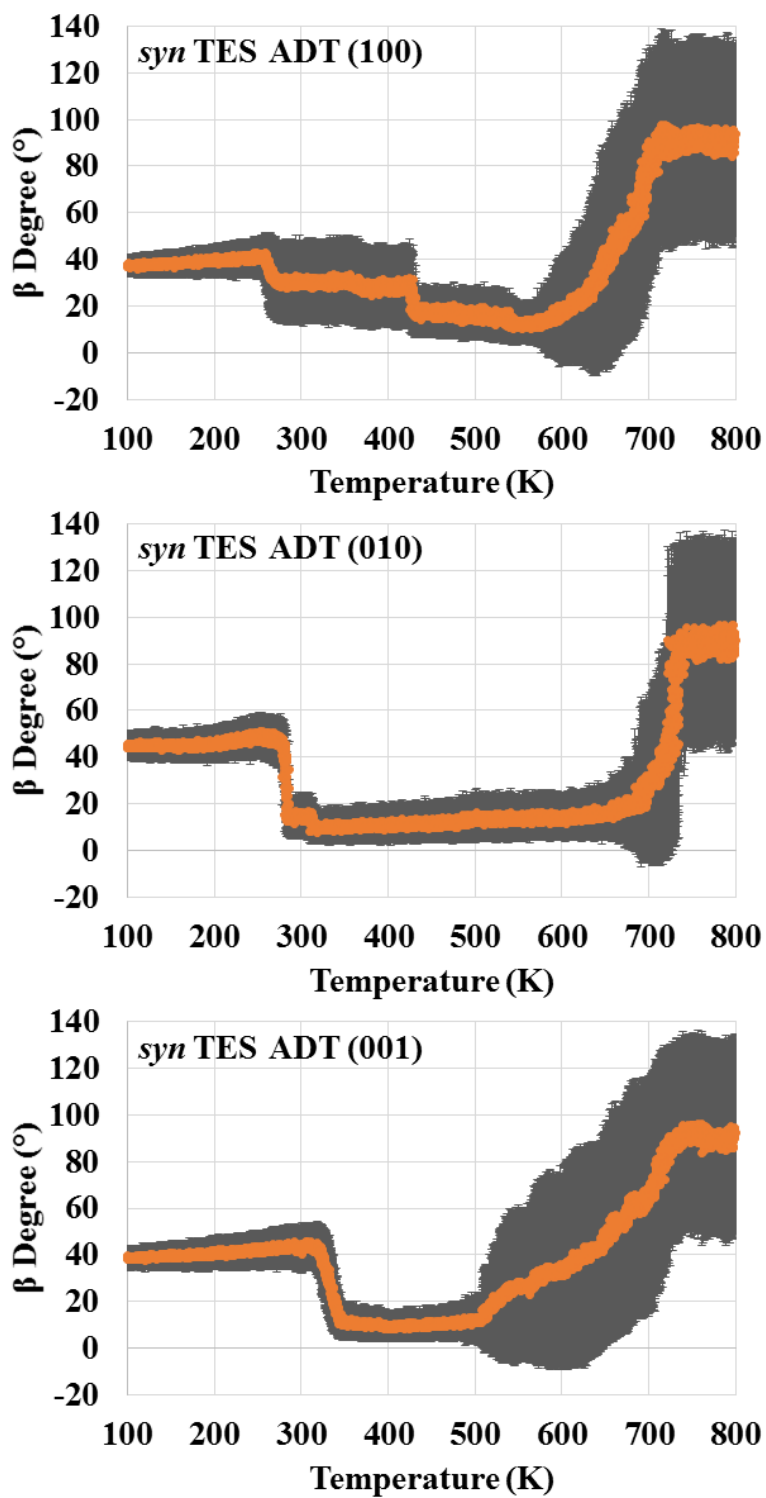

**Figure S11.** Angle between the two molecular planes in the same unit cell as a function of temperature.

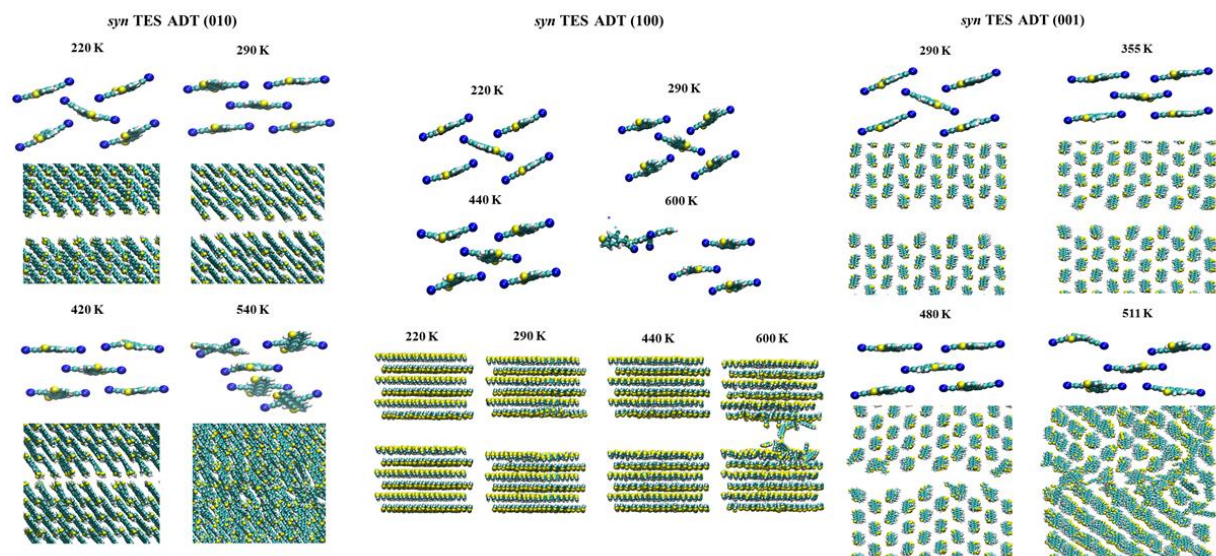

**Figure S12.** Snapshots of three *syn* TES-ADT slab systems during thermal annealing, showing the molecular reorientation before melting.



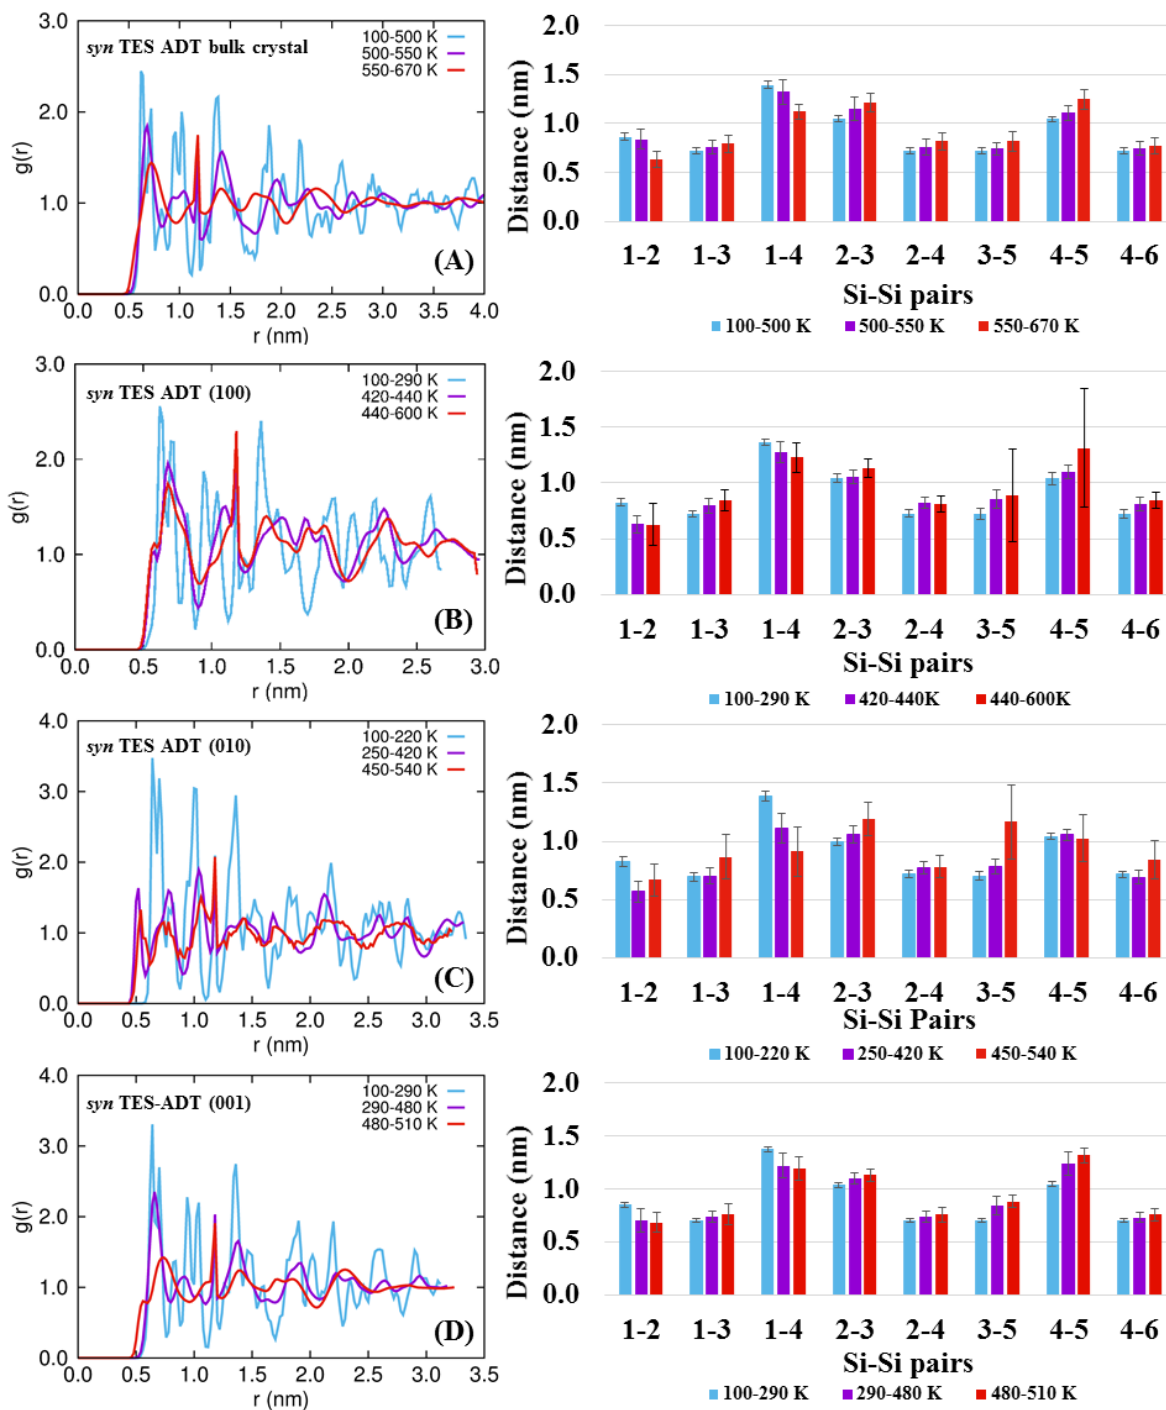

**Figure S13.** (Left) Radial distribution functions [ $g(r)$ ] for Si-Si pairs in the *syn* TES ADT bulk crystal and slab systems. (Right) Distances of Si-Si pairs at various stages of the thermal annealing process. The Si numbering is given in Figure 12.
